# Supplementary material
Source: publisher site journal article supplement (https://www.spandidos-publications.com/7665/downloadSupplementary)
Supplement: Supplementary file 1 [file downloadSupplementary]

Table SI. Summary of actionable mutations among 108 Taiwanese patients with breast cancer assayed with the TruSight Oncology 500.

| Gene         | Alteration (type) | Number of samples |
|--------------|-------------------|-------------------|
| <i>AKT1</i>  | E17K (MISSENSE)   | 4                 |
| <i>BRCA1</i> | FUSION (FUSION)   | 1                 |
|              | G1350C (MISSENSE) | 1                 |
|              | M1783L (MISSENSE) | 2                 |
|              | N909S (MISSENSE)  | 1                 |
|              | R1203* (TRUNC)    | 1                 |
|              | R1583K (MISSENSE) | 1                 |
|              | R762S (MISSENSE)  | 1                 |
|              | S1286Rfs (TRUNC)  | 1                 |
|              | S1389N (MISSENSE) | 1                 |
|              | S405* (TRUNC)     | 1                 |
|              | S632Ifs* (TRUNC)  | 1                 |
|              | V191I (MISSENSE)  | 1                 |
| <i>BRCA2</i> | C315S (MISSENSE)  | 1                 |
|              | E1571Gfs (TRUNC)  | 1                 |
|              | F2254Yfs (TRUNC)  | 1                 |
|              | FUSION (FUSION)   | 1                 |
|              | G2508S (MISSENSE) | 1                 |
|              | G2901D (MISSENSE) | 1                 |
|              | GAIN (CNA)        | 1                 |
|              | H523R (MISSENSE)  | 1                 |
|              | HETLOSS (CNA)     | 1                 |
|              | I1929V (MISSENSE) | 5                 |
|              | N2135Kfs (TRUNC)  | 1                 |
|              | N72S (MISSENSE)   | 2                 |
|              | P3292L (MISSENSE) | 1                 |
|              | R2108C (MISSENSE) | 5                 |
|              | R2842H (MISSENSE) | 1                 |
|              | S521* (TRUNC)     | 1                 |
|              | V2109I (MISSENSE) | 2                 |
|              | V2151Ffs (TRUNC)  | 1                 |
|              | V783A (MISSENSE)  | 1                 |
| <i>ERBB2</i> | A240S (MISSENSE)  | 1                 |
|              | AMP (CNA)         | 3                 |
|              | E1124K (MISSENSE) | 1                 |
|              | GAIN (CNA)        | 4                 |
|              | L725F (MISSENSE)  | 1                 |
|              | L725S (MISSENSE)  | 1                 |
|              | L811V (MISSENSE)  | 1                 |

|               |                     |    |
|---------------|---------------------|----|
|               | L839R (MISSENSE)    | 1  |
|               | P1140A (MISSENSE)   | 1  |
|               | Q798H (MISSENSE)    | 1  |
|               | T298K (MISSENSE)    | 1  |
|               | V743_M74 (INFRAME)  | 1  |
|               | Y742_A74 (INFRAME)  | 1  |
| <i>ERBB3</i>  | A1030T (MISSENSE)   | 1  |
|               | A182T (MISSENSE)    | 1  |
|               | E1317D (MISSENSE)   | 1  |
|               | F249L (MISSENSE)    | 1  |
|               | GAIN (CNA)          | 1  |
|               | M433T (MISSENSE)    | 1  |
|               | P590S (MISSENSE)    | 1  |
|               | R1202W (MISSENSE)   | 1  |
|               | R488Q (MISSENSE)    | 3  |
|               | T160A (MISSENSE)    | 1  |
| <i>ESR1</i>   | G145S (MISSENSE)    | 1  |
|               | GAIN (CNA)          | 1  |
|               | HETLOSS (CNA)       | 1  |
| <i>MDM2</i>   | AMP (CNA)           | 1  |
|               | HETLOSS (CNA)       | 1  |
| <i>NTRK1</i>  | E193Q (MISSENSE)    | 1  |
|               | E245A (MISSENSE)    | 1  |
|               | INSRR_V1 (MISSENSE) | 1  |
|               | K167R (MISSENSE)    | 1  |
|               | M530T (MISSENSE)    | 1  |
|               | Q259E (MISSENSE)    | 10 |
|               | R190Q (MISSENSE)    | 1  |
|               | R190W (MISSENSE)    | 2  |
|               | V252I (MISSENSE)    | 1  |
| <i>PIK3CA</i> | AMP (CNA)           | 1  |
|               | D350N (MISSENSE)    | 1  |
|               | D725N (MISSENSE)    | 1  |
|               | E453Q (MISSENSE)    | 1  |
|               | E542K (MISSENSE)    | 4  |
|               | E542Q (MISSENSE)    | 1  |
|               | E545G (MISSENSE)    | 1  |
|               | E545K (MISSENSE)    | 4  |
|               | E545Q (MISSENSE)    | 1  |
|               | E726K (MISSENSE)    | 2  |
|               | FUSION (FUSION)     | 6  |
|               | G1049R (MISSENSE)   | 1  |

|             |                    |    |
|-------------|--------------------|----|
|             | GAIN (CNA)         | 12 |
|             | H1047L (MISSENSE)  | 2  |
|             | H1047R (MISSENSE)  | 11 |
|             | H1047Y (MISSENSE)  | 1  |
|             | K733R (MISSENSE)   | 2  |
|             | N1068Kfs (TRUNC)   | 1  |
|             | N345I (MISSENSE)   | 1  |
|             | Q546R (MISSENSE)   | 1  |
| <i>PTEN</i> | E150* (TRUNC)      | 1  |
|             | E150Gfs* (TRUNC)   | 1  |
|             | E43Gfs*7 (TRUNC)   | 1  |
|             | G127_G12 (INFRAME) | 1  |
|             | HETLOSS (CNA)      | 6  |
|             | HOMDEL (CNA)       | 1  |
|             | P38Kfs*1 (TRUNC)   | 1  |
|             | Q245* (TRUNC)      | 1  |
|             | R130* (TRUNC)      | 1  |
|             | S226F (MISSENSE)   | 1  |
|             | V290Sfs* (TRUNC)   | 1  |

TRUNC/\*, truncating; CNA, copy number alteration; AMP, amplification; GAIN, copy number gain; LOSS, copy number loss; HETLOSS, heterozygous deletion; HOMDEL, homozygous deletion; fs, frameshift.

Table SII. Summary of actionable mutations among 108 Taiwanese patients with breast cancer assayed with the OncoPrint Comprehensive Assay Plus v3.

| Gene             | Alteration (type) | Number of samples |
|------------------|-------------------|-------------------|
| <i>AKT1</i>      | AMP (CNA)         | 2                 |
|                  | E17K (MISSENSE)   | 3                 |
| <i>BRCA1</i>     | R1203* (TRUNC)    | 1                 |
|                  | S1180fs (TRUNC)   | 1                 |
|                  | S1286fs (TRUNC)   | 1                 |
|                  | S405* (TRUNC)     | 1                 |
|                  | S632fs (TRUNC)    | 1                 |
|                  | T1376fs (TRUNC)   | 1                 |
|                  | W321* (TRUNC)     | 1                 |
| <i>BRCA2</i>     | E1571fs (TRUNC)   | 1                 |
|                  | E33* (TRUNC)      | 1                 |
|                  | N2135fs (TRUNC)   | 1                 |
|                  | N372H (MISSENSE)  | 3                 |
|                  | S3041fs (TRUNC)   | 1                 |
|                  | S3147fs (TRUNC)   | 1                 |
|                  | S521* (TRUNC)     | 1                 |
|                  | S538fs (TRUNC)    | 1                 |
|                  | S973fs (TRUNC)    | 1                 |
|                  | T598fs (TRUNC)    | 1                 |
| T912fs (TRUNC)   | 1                 |                   |
| <i>ERBB2</i>     | AMP (CNA)         | 1                 |
|                  | I655V (MISSENSE)  | 18                |
|                  | L755S (MISSENSE)  | 1                 |
|                  | L841V (MISSENSE)  | 1                 |
|                  | L869R (MISSENSE)  | 1                 |
| <i>NTRK1</i>     | AMP (CNA)         | 5                 |
| <i>PIK3CA</i>    | AMP (CNA)         | 2                 |
|                  | E453Q (MISSENSE)  | 1                 |
|                  | E542K (MISSENSE)  | 4                 |
|                  | E542Q (MISSENSE)  | 1                 |
|                  | E545K (MISSENSE)  | 4                 |
|                  | E545Q (MISSENSE)  | 1                 |
|                  | E726K (MISSENSE)  | 2                 |
|                  | FUSION (FUSION)   | 2                 |
|                  | G1049R (MISSENSE) | 1                 |
|                  | H1047L (MISSENSE) | 2                 |
|                  | H1047R (MISSENSE) | 12                |
|                  | H1047Y (MISSENSE) | 1                 |
|                  | N345I (MISSENSE)  | 1                 |
| Q546R (MISSENSE) | 1                 |                   |
| <i>PTEN</i>      | E150* (TRUNC)     | 1                 |
|                  | E43fs (TRUNC)     | 1                 |
|                  | G129E (MISSENSE)  | 1                 |
|                  | P38fs (TRUNC)     | 1                 |
|                  | Q245* (TRUNC)     | 1                 |
|                  | R130* (TRUNC)     | 1                 |

TRUNC/\*, truncating; CNA, copy number alteration; AMP, amplification; fs, frameshift.
